# Supplementary material for: Optimizing Rehabilitation for Phantom Limb Pain Using Mirror Therapy and Transcranial Direct Current Stimulation: A Randomized, Double–Blind Clinical Trial Study Protocol
Source: PubMed Central journal article supplement (PMC4954918; doi:10.2196/resprot.5645), 2016-07-06

# Optimizing Rehabilitation for Phantom Limb Pain Using Mirror Therapy and transcranial Direct Current Stimulation (tDCS): A randomized, double – blind clinical trial Study Protocol

Funded by NIH  
Clinicaltrials.gov: NCT02487966

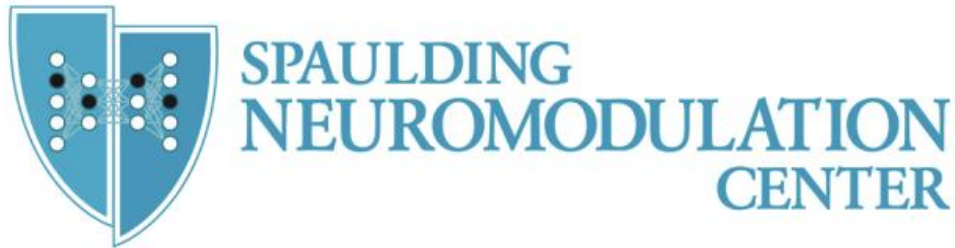

# tDCS

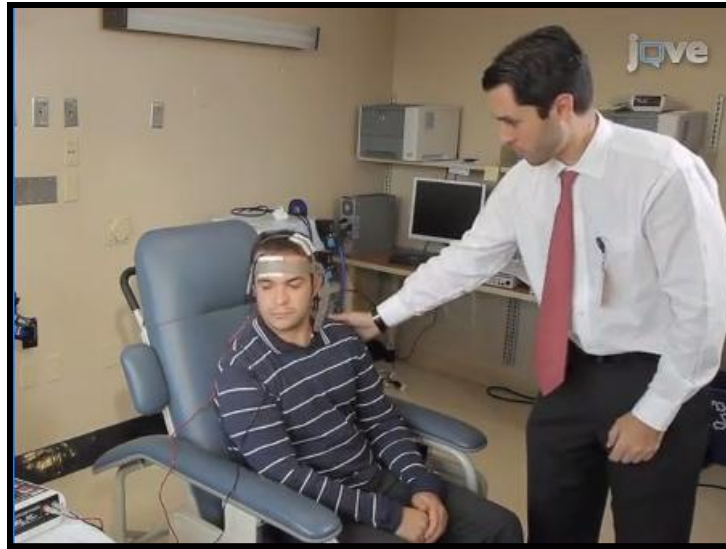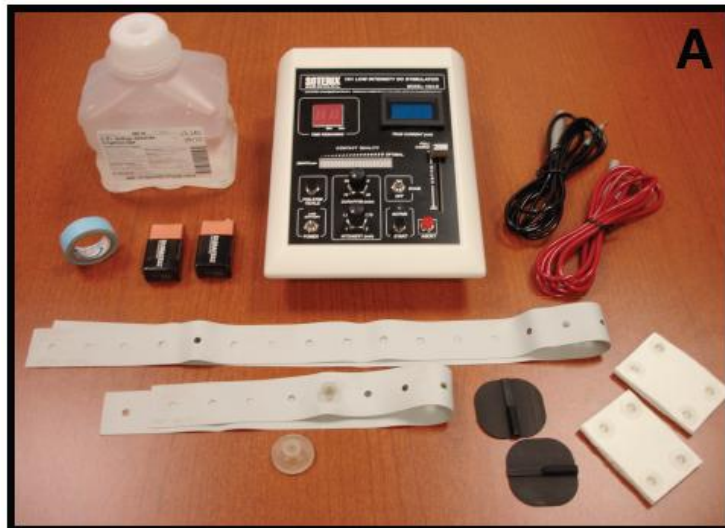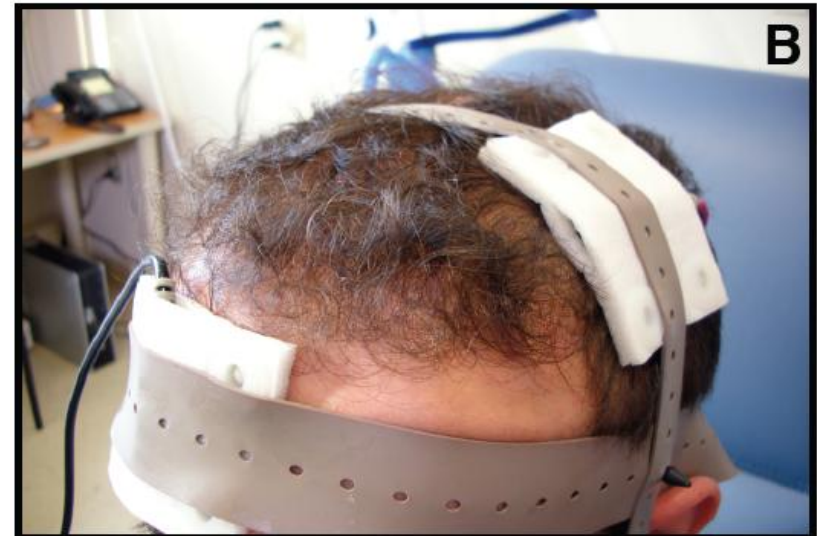

- Primary Aim: To evaluate the efficacy of tDCS and mirror therapy (MT) as rehabilitative tools for the management of pain on chronic PLP patients.
- Secondary Aim: To examine the mechanisms underlying PLP using two neurophysiological techniques.

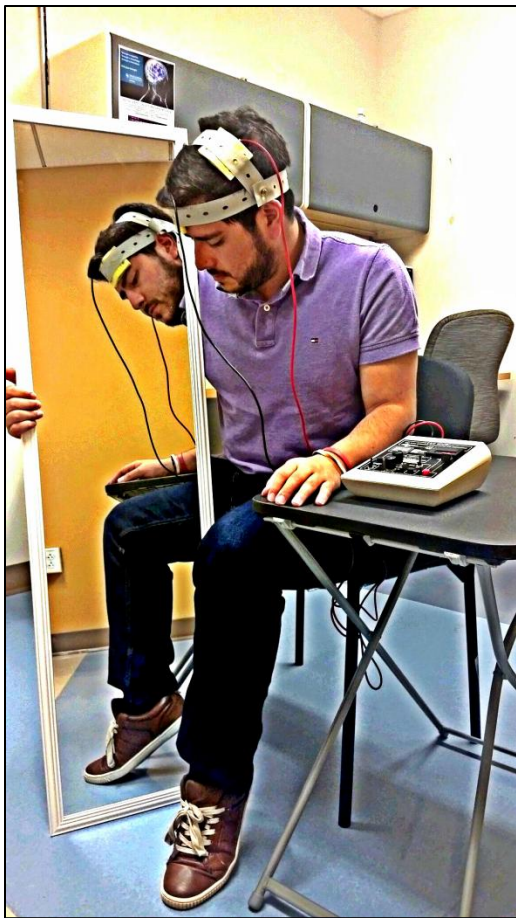

**132 participants**  
randomized in 4  
intervention groups

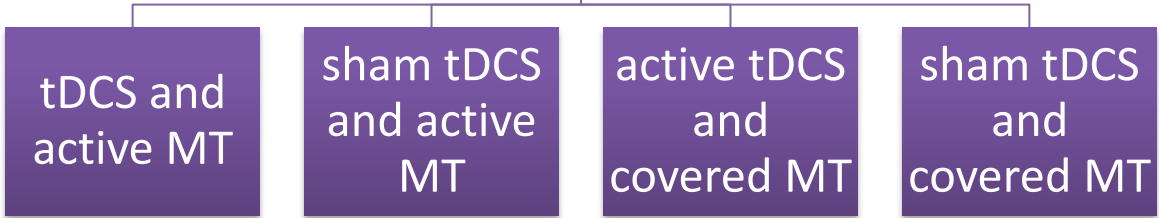

## fMRI

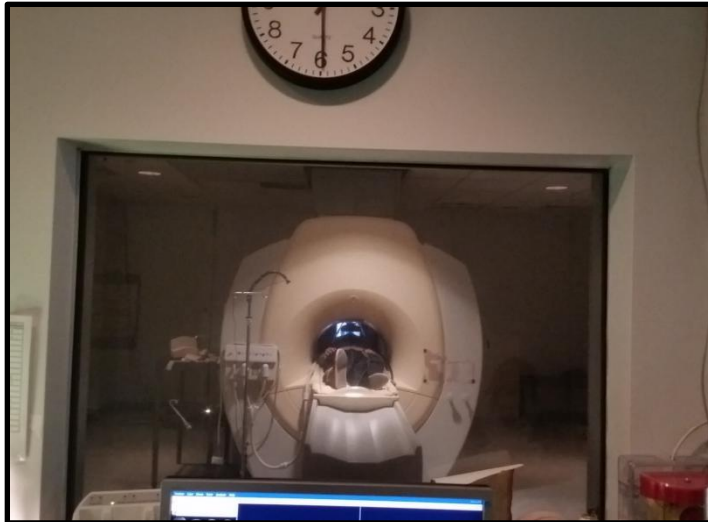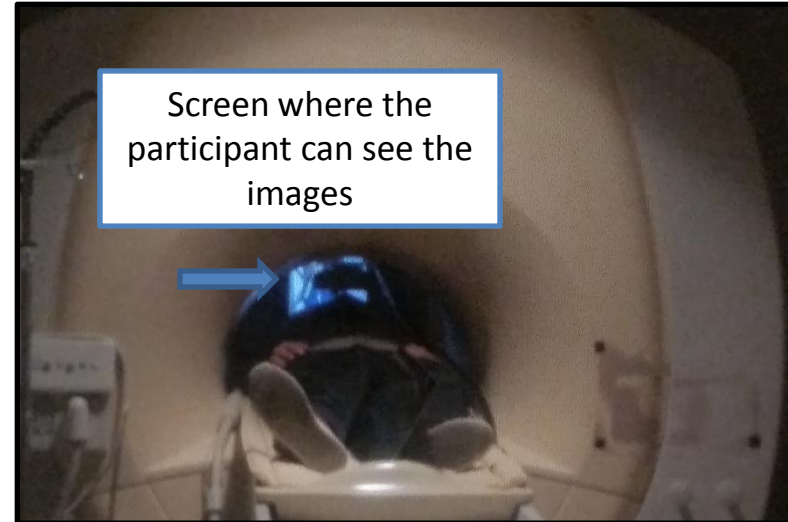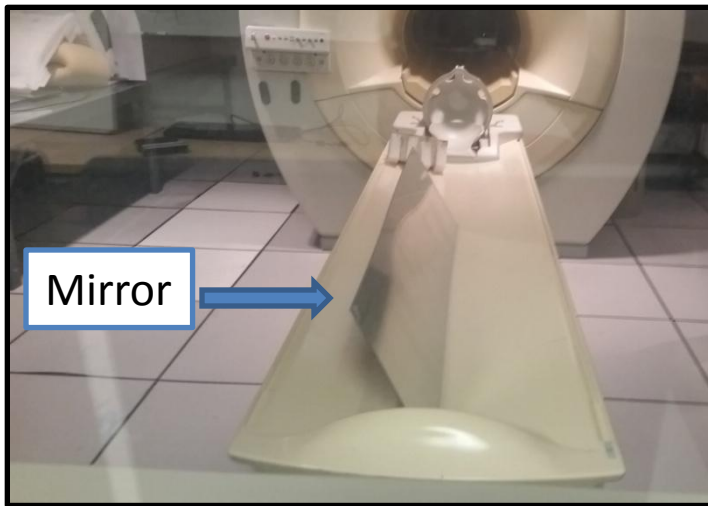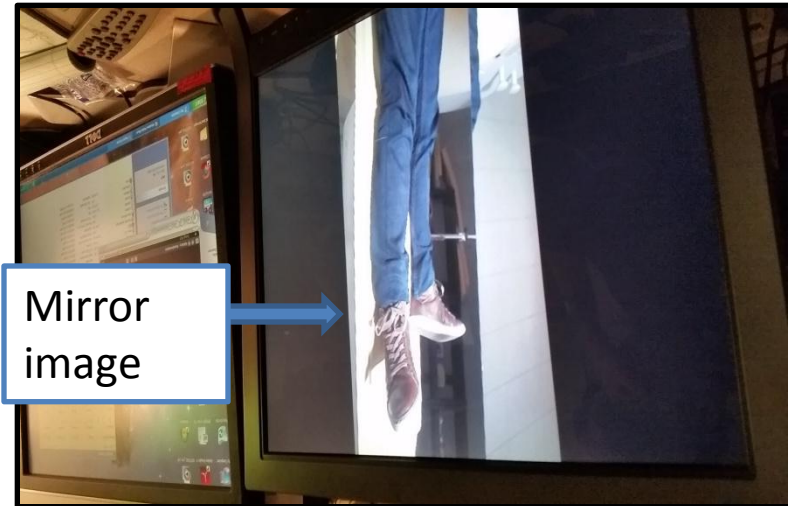

# Main Inclusion/Exclusion Criteria

- Older than 18 years
- Unilateral lower limb amputation
- **Traumatic etiology**
- Have chronic phantom limb for at least 3 months
- No metallic implants on head or neck

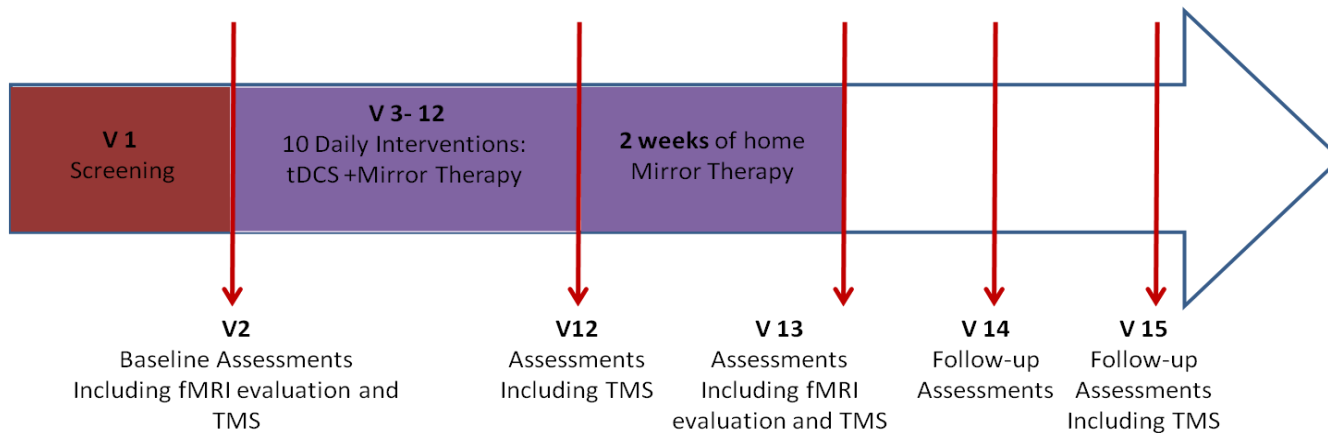

# Thank You

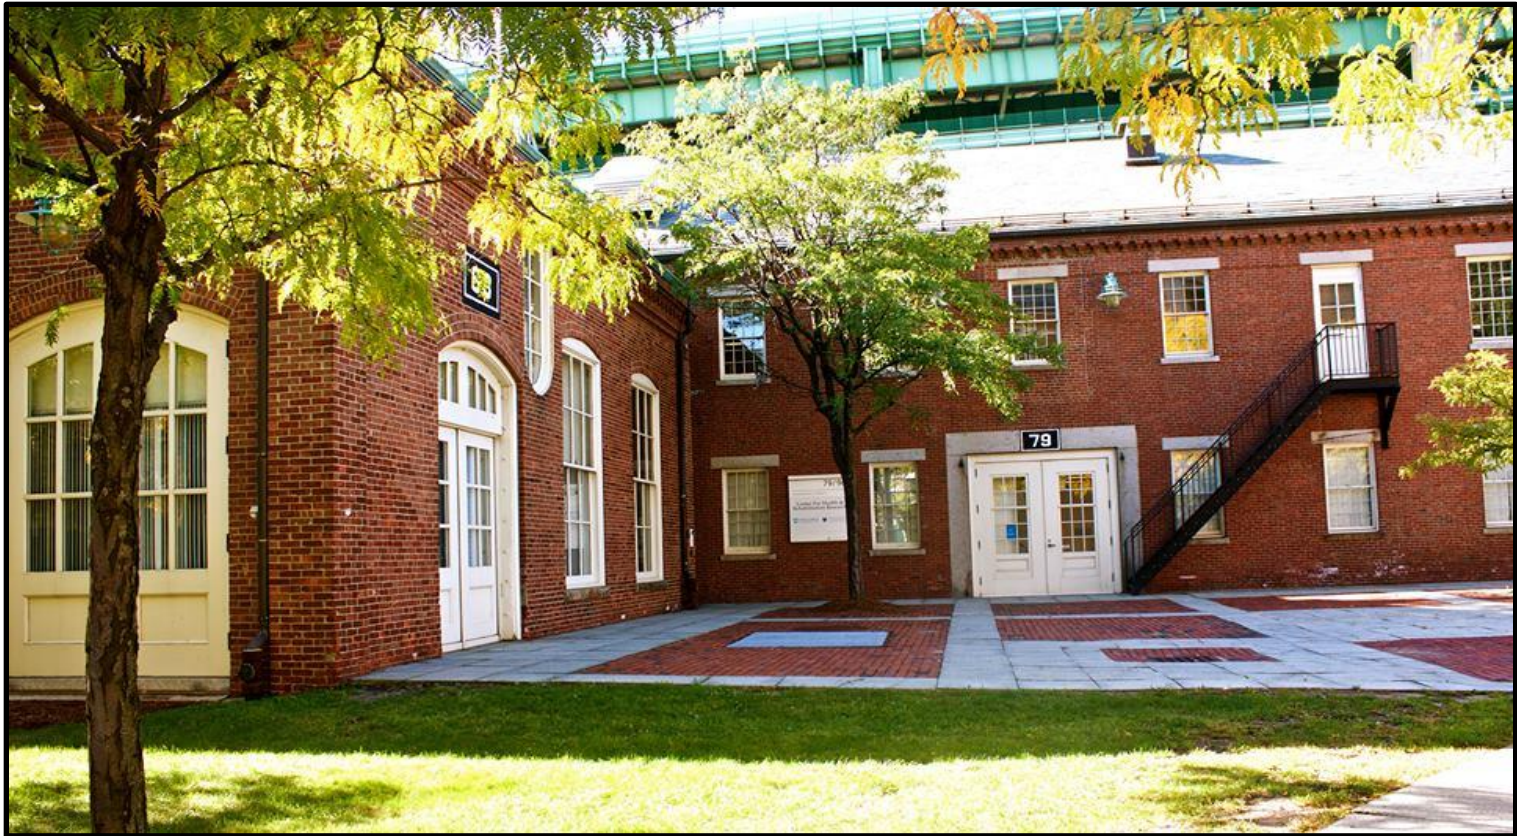

Supplement: resprot_v5i3e138_app1.pdf [file resprot_v5i3e138_app1.pdf]
